# Supplementary material for: Unveiling Metal Tolerance Mechanisms in Leersia hexandra Swartz under Cr/Ni Co-Pollution by Studying Endophytes and Plant Metabolites
Source: MDPI journal article supplement (doi:10.3390/metabo14040231), 2024-04-18
Supplement: s1 [file s1]

## SUPPLEMENTARY INFORMATION

Article

# Unveiling Metal Tolerance Mechanisms in *Leersia hexandra* Swartz under Cr/Ni Co-Pollution by Studying Endophytes and Plant Metabolites

Mouyixing Chen <sup>1</sup>, Guo Yu <sup>2</sup>, Hui Qiu <sup>1</sup>, Pingping Jiang <sup>3,4,\*</sup>, Xuemei Zhong <sup>3,4,\*</sup> and Jie Liu <sup>1,5</sup>

<sup>1</sup> College of Environmental Science and Engineering, Guilin University of Technology, Guilin 541004, China; chenmouyixing@glut.edu.cn (M.C.); qiuhui@glut.edu.cn (H.Q.); liujie@glut.edu.cn (J.L.)

<sup>2</sup> Center for Water and Ecology, State Key Joint Laboratory of Environment Simulation and Pollution Control, School of Environment, Tsinghua University, Beijing 100084, China; yuguo@glut.edu.cn

<sup>3</sup> College of Earth Sciences, Guilin University of Technology, Guilin 541004, China

<sup>4</sup> Guangxi Key Laboratory of Exploration for Hidden Metallic Ore Deposits, Guilin 541004, China

<sup>5</sup> Guangxi Key Laboratory of Environmental Pollution Control Theory and Technology, Guilin University of Technology, Guilin 541004, China

\* Correspondence: jiangpp@glut.edu.cn (P.J.); zxm@glut.edu.cn (X.Z.)

**Table S1.** Data preprocessing statistics and quality control.

| Sample Name | Raw Reads | Clean Reads | Raw Tags | Clean Tags | Chimera | Effective Tags | Effective Ratio (%) |
|-------------|-----------|-------------|----------|------------|---------|----------------|---------------------|
| CK-1        | 125,810   | 125,739     | 124,684  | 123,412    | 7409    | 116,003        | 92.20               |
| CK-2        | 125,496   | 125,442     | 124,311  | 122,824    | 16,560  | 106,264        | 84.68               |
| CK-3        | 124,120   | 124,068     | 122,850  | 121,381    | 20,260  | 101,121        | 81.47               |
| T-1         | 123,575   | 123,521     | 122,493  | 121,280    | 17,399  | 103,881        | 84.06               |
| T-2         | 135,559   | 135,501     | 134,368  | 133,133    | 18,562  | 114,571        | 84.52               |
| T-3         | 131,301   | 131,243     | 130,001  | 128,553    | 8666    | 119,887        | 91.31               |

**Table S2.** Edge table. The first two columns indicate the metabolite species and the last two columns indicate the correlation between the two, the significance of the correlation.

| Compound_ID  | Compounds                    | Phylum         | cor          | p_value     |
|--------------|------------------------------|----------------|--------------|-------------|
| Com_11_pos   | Tryptamine                   | Proteobacteria | -0.840380859 | 0.036183995 |
| Com_154_pos  | Serotonin                    | Proteobacteria | -0.869212411 | 0.024539503 |
| Com_171_pos  | L-Canavanine                 | Proteobacteria | -0.861091461 | 0.027603213 |
| Com_329_pos  | 2-Aminoadipic acid           | Proteobacteria | -0.873086623 | 0.023138411 |
| Com_336_pos  | Syringetin 3-O-hexoside      | Proteobacteria | -0.874866107 | 0.022508033 |
| Com_465_pos  | Limocitrin O-hexoside        | Proteobacteria | -0.8984472   | 0.014945801 |
| Com_478_pos  | 2-Methoxyhexadecanoate       | Proteobacteria | -0.8912878   | 0.017085115 |
| Com_612_pos  | Imidazole-4-acetate          | Proteobacteria | -0.924498404 | 0.008335538 |
| Com_645_pos  | L-2-Aminoadipic acid         | Proteobacteria | -0.844219541 | 0.034511122 |
| Com_675_neg  | Diosmetin                    | Proteobacteria | 0.841699196  | 0.035605275 |
| Com_745_neg  | Lactose                      | Proteobacteria | -0.861542328 | 0.027428637 |
| Com_894_neg  | D-(+)-Cellobiose             | Proteobacteria | -0.819246115 | 0.046055158 |
| Com_966_neg  | Coniferin                    | Proteobacteria | -0.849771967 | 0.032157485 |
| Com_1095_neg | Isomaltulose                 | Proteobacteria | -0.826714915 | 0.042439903 |
| Com_11_pos   | Tryptamine                   | Bacteroidota   | 0.911573017  | 0.011383277 |
| Com_154_pos  | Serotonin                    | Bacteroidota   | 0.927503756  | 0.007693049 |
| Com_171_pos  | L-Canavanine                 | Bacteroidota   | 0.920410239  | 0.009249713 |
| Com_183_pos  | Valine                       | Bacteroidota   | 0.87052496   | 0.024060433 |
| Com_329_pos  | 2-Aminoadipic acid           | Bacteroidota   | 0.938298714  | 0.005593123 |
| Com_330_pos  | Aspartic acid di-O-glucoside | Bacteroidota   | 0.827344088  | 0.042141654 |
| Com_336_pos  | Syringetin 3-O-hexoside      | Bacteroidota   | 0.937638791  | 0.005712122 |
| Com_465_pos  | Limocitrin O-hexoside        | Bacteroidota   | 0.950865596  | 0.003561975 |
| Com_478_pos  | 2-Methoxyhexadecanoate       | Bacteroidota   | 0.958100997  | 0.002596512 |
| Com_547_pos  | Syringetin 5-O-hexoside      | Bacteroidota   | 0.842220325  | 0.035377721 |
| Com_612_pos  | Imidazole-4-acetate          | Bacteroidota   | 0.967974902  | 0.001521988 |
| Com_645_pos  | L-2-Aminoadipic acid         | Bacteroidota   | 0.91520818   | 0.010479667 |
| Com_675_neg  | Diosmetin                    | Bacteroidota   | -0.910125971 | 0.01175304  |
| Com_726_neg  | alpha,alpha-Trehalose        | Bacteroidota   | 0.858939195  | 0.028443801 |
| Com_745_neg  | Lactose                      | Bacteroidota   | 0.919981343  | 0.009348299 |
| Com_781_neg  | Trehalose 6-phosphate        | Bacteroidota   | 0.835434228  | 0.038394464 |
| Com_894_neg  | D-(+)-Cellobiose             | Bacteroidota   | 0.897632897  | 0.015182182 |
| Com_923_neg  | Galactinol                   | Bacteroidota   | 0.860901423  | 0.027676953 |
| Com_952_neg  | Sucrose                      | Bacteroidota   | 0.815999287  | 0.047669605 |
| Com_966_neg  | Coniferin                    | Bacteroidota   | 0.906444116  | 0.012719622 |
| Com_967_neg  | Trifolin                     | Bacteroidota   | 0.8281348    | 0.041768223 |
| Com_1075_neg | 2,3-Dihydroxybenzoic acid    | Bacteroidota   | 0.824044572  | 0.043716651 |
| Com_1095_neg | Isomaltulose                 | Bacteroidota   | 0.882934946  | 0.019754197 |
| Com_416_pos  | Apo-13-zeaxanthinone         | Firmicutes     | 0.846827145  | 0.03339602  |
| Com_992_neg  | Crocetin                     | Firmicutes     | 0.814367763  | 0.04849061  |
